# Supplementary material for: Chelerythrine-Induced Apoptotic Cell Death in HepG2 Cells Involves the Inhibition of Akt Pathway and the Activation of Oxidative Stress and Mitochondrial Apoptotic Pathway
Source: MDPI journal article supplement (doi:10.3390/antiox11091837), 2022-09-18
Supplement: s1 [file s1]

# Suppl. Materials and Methods.

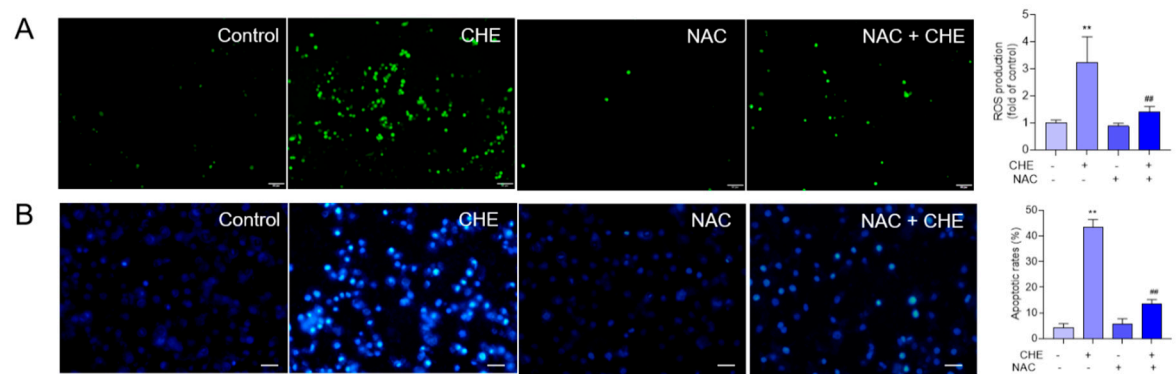

**Suppl. Figure S1** NAC supplementation attenuates CHE-induced the production of ROS and apoptosis in HepG2 cells. A, the levels of ROS production. B, Measurement of cell apoptosis. The representative images were obtained using a fluorescence microscope. All results were presented as mean  $\pm$  SD (n =3 independent experiments). \*P<0.05 or \*\*P<0.01, compared to the control group. Scale Bar=25  $\mu$ m.
